# Supplementary material for: Indo-European Grammar: Mood
Source: PLOS journal article supplement (doi:10.1371/journal.pone.0088839), 2014-05-13
Supplement: S2 (10.1371/journal.pone.0088839.s002) [file journal.pone.0088839.s002]

## Appendix S1: Parameterization of Simulation Models

Andrey Ziyatdinov<sup>1,2</sup>, Alexandre Perera-Lluna<sup>1,2</sup>

**1 Department of ESAII, Universitat Politècnica de Catalunya, Pau Gargallo 5, Barcelona, Spain**

**2 Centro de Investigación Biomédica en Red en Bioingeniería, Biomateriales y Nanomedicina (CIBER-BBN), Barcelona, Spain**

The virtual sensors available in *chemosensors* package are derived from the seventeen UNIMAN sensors based on the model parameters computed for the UNIMAN data set in [1]. In this section, we briefly review the simulation models and their parameters, in order to demonstrate the mechanism of creating virtual sensors.

The sorption model defined in Equation 1 establishes a relation between the environmental concentrations of analytes  $C_{0i}$  and the concentrations of analytes  $C_i$  when adsorbed by the sensor device. This relationship underlines the Langmuir isotherm for a multi-component gas mixture with two parameters for each analyte  $i$ , sorption capacity  $Q_i$  and sorption affinity  $K_i$  [2].

$$C_i = \frac{Q_i K_i C_{0i}}{1 + \sum_{j=1}^3 K_j C_{0j}}, \quad i = 1, 2, 3 \quad (1)$$

The parameters of the sorption model can be used to control such characteristics of virtual sensors as non-linearity and affinity to analytes in a mixture.

- The *Non-linearity* of a sensor depends on a relation between the numerator and the denominator in the equation. Smaller values of the affinity coefficients  $K_i$  make the denominator closer to one, resulting in linear behaviour of the sensor. On the contrary, greater values of  $K_i$  lead to saturation mode, where the magnitude of the output concentrations does not depend on the input concentrations.
- The *Affinity* property of a sensor to analyte  $i$  in a mixture is controlled by parameter  $K_i$ , and is to be estimated by comparison with the affinities for the other analytes.

A static calibration model was defined in Equations (2) and (3) in [1] and simulated the steady-state signal  $x_{ss}$  of a sensor in response to the concentrations  $C_i$  derived from the sorption model. The calibration model explicitly assumed that the response to a mixture of analytes is the sum of the individual responses to analytes. The main parameters of the model were the sensitivity coefficients  $\beta_{i,k}$  to analyte  $i$  on the concentration interval  $k$ . The calibration model defines such characteristics of a virtual sensor as its sensitivity, selectivity and diversity.

- The *Sensitivity* coefficients  $\beta_i$  give a quantitative estimate of how sensitive a sensor is in response to the analyte  $i$  on the given concentration interval  $k$ .
- The *Selectivity* of a sensor across two analytes  $i$  and  $j$  can be evaluated by comparing the sensitivity coefficients  $\beta_i$  and  $\beta_j$  along the analytes.
- The *Diversity* property of a group of sensors is related to the redundancy of the sensor sensitivity coefficient  $\beta$ , and is to be estimated by some multi-variate method.

A dynamic calibration model was defined in Equation (5) in [1] and described the dynamic part of the calibration model. The model derived the temporal signal  $x(t)$  from the steady state value  $x_{ss}$ . The model had two time constants per analyte as parameters,  $\tau_{1,i}$  and  $\tau_{2,i}$  for the analyte  $i$ . The transient model was rather simple, and we suggest relying on the steady state feature of the signal  $x_{ss}$ , rather than on transient features which could be extracted from the signal  $x(t)$ .

In summary, the sorption and calibration models simulate the seventeen UNIMAN sensors by a set of parameters  $K_i$ ,  $\beta_{i,k}$ ,  $\tau_{1,i}$  and  $\tau_{2,i}$  for each sensor. When one defines an array of virtual sensors in the *chemosensors* package, the UNIMAN sensors are replicated by varying the parameters of the simulation models. Parameters  $\beta_{i,k}$ ,  $\tau_{1,i}$  and  $\tau_{2,i}$  are generated from univariate uniform distributions with control for non-negative values and the level of spread. The parameters  $K_i$  are estimated from the seventeen UNIMAN profiles, this allows preservation of the intrinsic number of sensor types given in the reference UNIMAN data set. Hence, one can imagine a virtual sensor as a *replica* of one of the seventeen UNIMAN sensors with similar characteristics on their sensitivity and selectivity profiles, the dynamic ranges for the three analytes and their signal-to-noise performance. The diversity of sensors come from two sources: the relationship between sensors found the reference UNIMAN data set and the distribution of  $\beta_{i,k}$  coefficients.

The second group of simulation models defined three types of noise to be injected into the sensor signals. These types were characterised as additive, multiplicative and common noise, corresponding respectively to the concentration, sensor and drift noise models. Data in all three noise models were generated by means of a multi-variate normal distribution of independent variables with diagonal covariance  $\Sigma$ -matrices and zero mean, as shown in Equations (6), (7) and (8) in [1].

The concentration noise model defined the noise term  $\Delta C_0$  to be added to the matrix of analyte concentrations  $C_0$ . The data in the columns of the matrix  $\Delta C_0$  corresponded to the analytes A, B and C, and were derived from the normal distribution with zero mean and diagonal covariance matrix  $\Sigma_c$ . The diagonal form of the covariance matrix underlined the fact that the analytes do not interact with each other.

The sensor noise model generated noise in the sensitivity coefficients  $\beta_{i,k}$  from the calibration model. A one-dimensional random walk based on the normal distribution with zero-mean and a single parameter, the standard deviation  $\sigma_{i,k}$ , was used for analyte  $i$  on the concentration interval  $k$ .

The drift noise model defined the drift noise  $\Delta X_P$  to be injected into the matrix of sensor array data  $X$  in a multi-variate manner which consisted of several steps. Firstly, a drift-related subspace  $P$  was computed by means of Common Principal Component Analysis (CPCA) [3]. Secondly, the noise  $\Delta X_P$  within this subspace  $P$  was generated via a random walk. A multi-dimensional random walk based on a multi-variate normal distribution with zero mean and diagonal covariance matrix  $\Sigma_d$  was used. Thirdly, the generated noise  $\Delta X_P$  was induced by means of the inverse component correction method [1].

The magnitude and the structure of the noise in the noise models are mainly controlled by the three standard deviation parameters, along with some other parameters.

## References

1. Ziyatdinov A, Fernández Diaz E, Chaudry A, Marco S, Persaud K, et al. (2013) A software tool for large-scale synthetic experiments based on polymeric sensor arrays. *Sensors and Actuators B: Chemical* 177: 596–604.
2. Bai R, Yang RT (2003) Improved Multisite Langmuir Model for Mixture Adsorption Using Multi-region Adsorption Theory. *Langmuir* : 2776–2781.
3. Ziyatdinov A, Marco S, Chaudry A, Persaud K, Caminal P, et al. (2010) Drift compensation of gas sensor array data by common principal component analysis. *Sensors and Actuators B: Chemical* 146: 460–465.
